# Supplementary material for: Soaking suggests “alternative facts”: Only co-crystallization discloses major ligand-induced interface rearrangements of a homodimeric tRNA-binding protein indicating a novel mode-of-inhibition
Source: PLOS journal article supplement (doi:10.1371/journal.pone.0175723), 2017-04-18
Supplement: S7 (10.1371/journal.pone.0175723.s007) [file journal.pone.0175723.s007]

## Relative proportions of TGT monomers measured by native MS

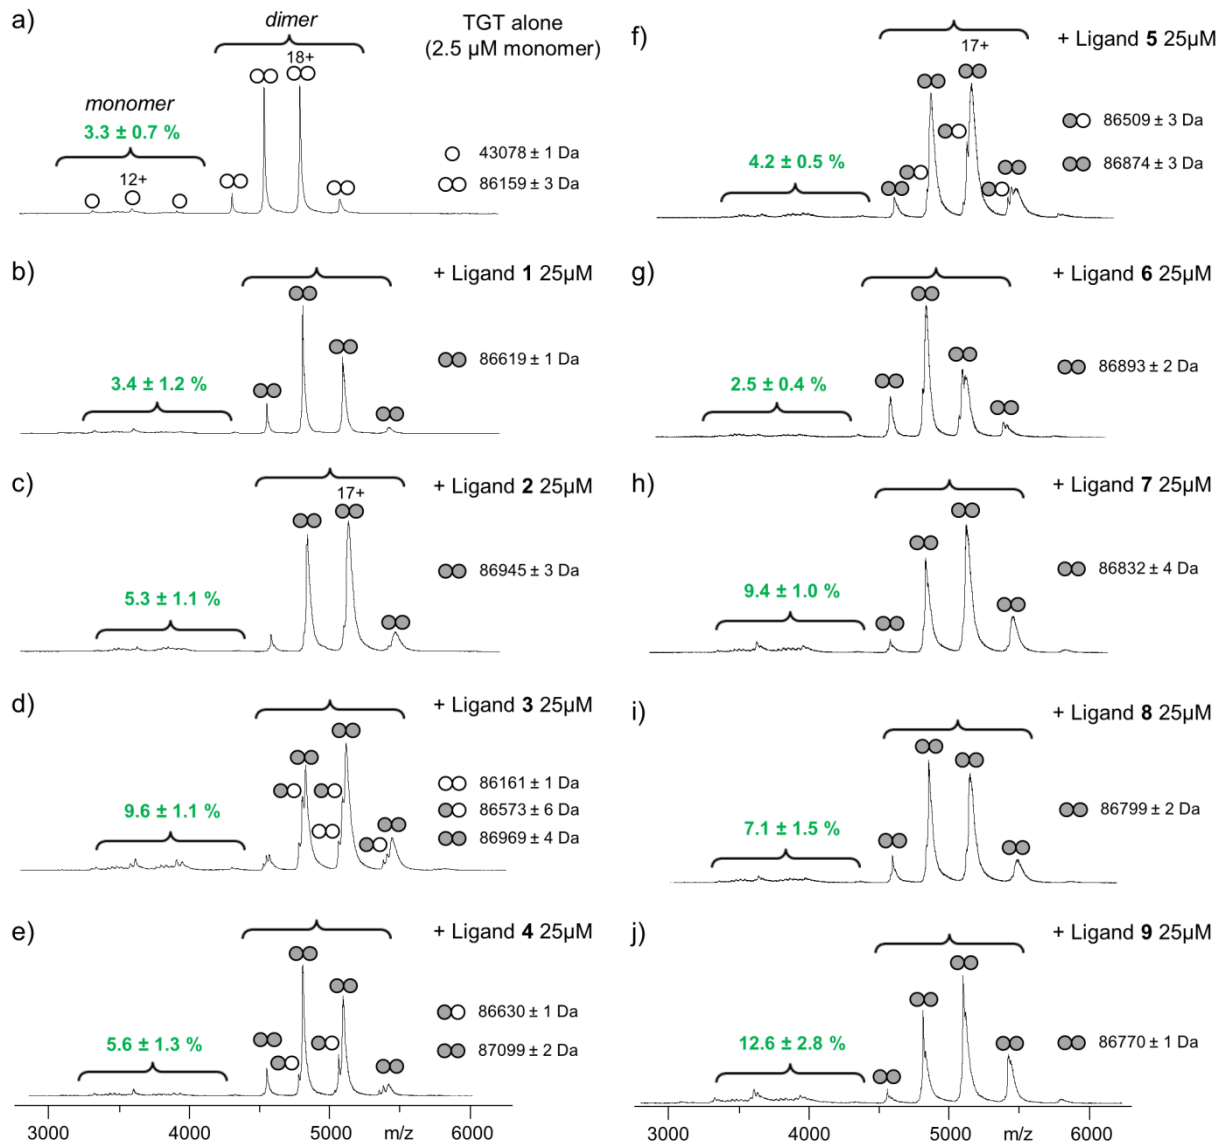

**Figure S7.** Native MS spectra of TGT:ligand mixtures. Measurements were performed in 1M NH<sub>4</sub>Ac pH 7.5, V<sub>c</sub> = 80V, P<sub>i</sub> = 6 mbar. **a)** Native MS spectrum of apo-TGT (TGT monomers = 2.5  $\mu$ M). **b) – j)** Native MS spectra of holo-TGT:ligand **1 – 9** mixtures (TGT monomers = 2.5  $\mu$ M; Ligand = 25  $\mu$ M).
